# Supplementary material for: Antioxidant and Antiproliferative Activities of Kale (Brassica oleracea L. Var. acephala DC.) and Wild Cabbage (Brassica incana Ten.) Polyphenolic Extracts
Source: MDPI journal article supplement (doi:10.3390/molecules28041840), 2023-02-15
Supplement: s1 [file s1]

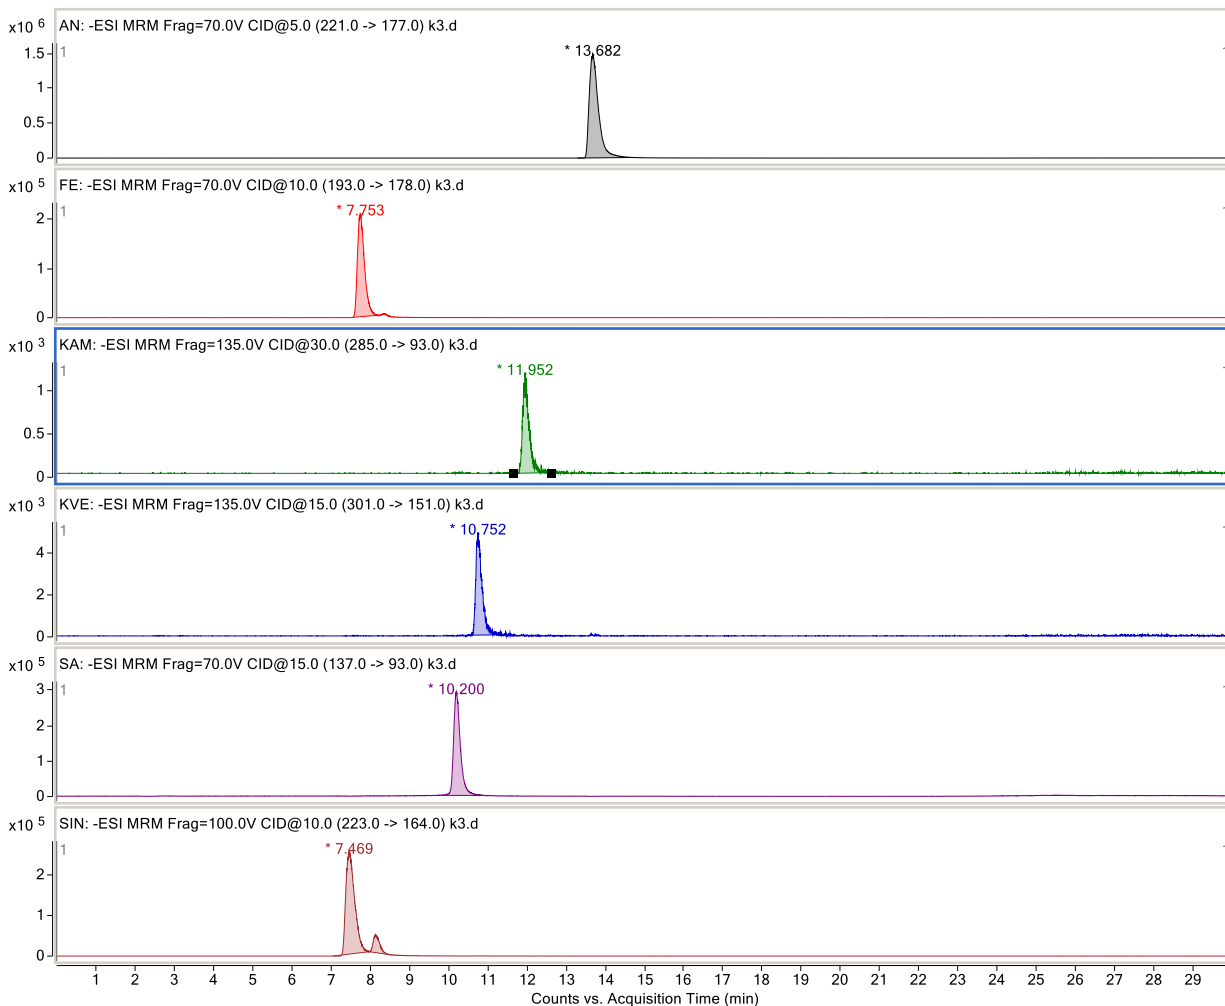

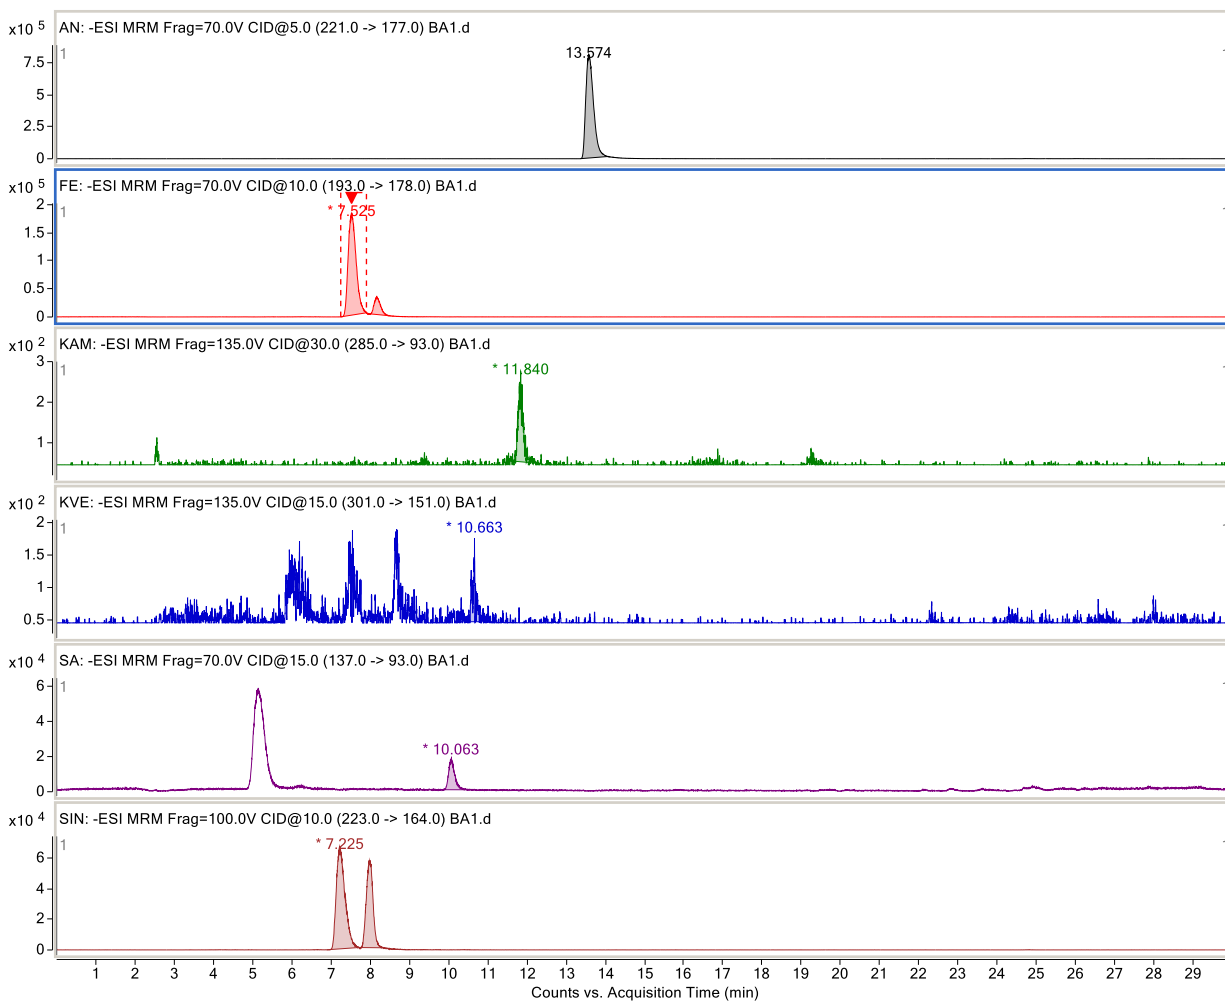

Figure S1. Representative MRM chromatograms of standard mixture: Anthracene-9-carboxylic acid (AN), Ferulic acid (FE), Kaemferol (KAM), Quercetin (KVE), Salicylic acid (SA), Sinapic acid (SIN) (upper), and representative MRM chromatograms of kale (*Brassica oleracea* var. *acephala*) (lower).

Table S1. List of phenolic compounds and used internal standard (anthracene-9-carboxylic acid) determined by UPLC–MS/MS, and the MRM transitions of precursor to product ion pairs.

| Compound (Abbreviation)                | MRM ( <i>m/z</i> ) |
|----------------------------------------|--------------------|
| <i>cis, trans</i> - Sinapic acid (SiA) | 223.0 -> 164.0     |
| <i>trans</i> -Ferulic acid (FA)        | 193.0 -> 178.0     |
| Salicylic acid (SA)                    | 137.0 -> 93.0      |
| Quercetin (QUE)                        | 301.0 -> 151.0     |
| Kaemferol (KAE)                        | 285.0 -> 93.0      |
| Anthracene-9-carboxylic acid (AN)      | 221.0 -> 177.0     |
